# Supplementary material for: A Systematic Review of Interventions to Change Staff Care Practices in Order to Improve Resident Outcomes in Nursing Homes
Source: PubMed Central journal article supplement (PMC4641718; doi:10.1371/journal.pone.0140711), 2015-11-11
Supplement: pone.0140711.s001.pdf [file pone.0140711.s001.pdf]

## S1 APPENDIX

## Risk of bias ratings

| First author | Year | Title                                                                                                                                                                                              | Bias_no random allocation | Bias_allocation not concealed | Bias_baseline outcomes not similar | Bias_baseline characteristics not similar | Bias_incomplete data not addressed | Bias_not blindly assessed | Bias_contamination not prevented | Bias_selective outcome reporting | Bias_other biases | Bias_clustering not analyzed |
|--------------|------|----------------------------------------------------------------------------------------------------------------------------------------------------------------------------------------------------|---------------------------|-------------------------------|------------------------------------|-------------------------------------------|------------------------------------|---------------------------|----------------------------------|----------------------------------|-------------------|------------------------------|
| Achterberg   | 2001 | Improvements in the quality of co-ordination of nursing care following implementation of the Resident Assessment Instrument in Dutch nursing homes                                                 | X                         | X                             | X                                  |                                           | U                                  | X                         | U                                |                                  |                   |                              |
| Avorn        | 1992 | A randomized trial of a program to reduce the use of psychoactive drugs in nursing homes                                                                                                           | U                         | X                             |                                    |                                           | U                                  |                           |                                  |                                  |                   |                              |
| Baier        | 2008 | Aiming for star performance: the relationship between setting targets and improved nursing home quality of care                                                                                    | X                         | X                             | X                                  |                                           | U                                  | X                         | X                                |                                  | X                 |                              |
| Baldwin      | 2010 | Cluster randomized controlled trial of an infection control education and training intervention programme focusing on meticillin-resistant Staphylococcus aureus in nursing homes for older people |                           | X                             |                                    |                                           | U                                  | X                         |                                  |                                  |                   |                              |
| Becker       | 2011 | Reduction of femoral fractures in long-term care facilities: the Bavarian fracture prevention study.                                                                                               | X                         | X                             |                                    |                                           | U                                  |                           | X                                | X                                | X                 | X                            |
| Beckman      | 2013 | A multi-faceted tailored strategy to implement an electronic clinical decision support system for pressure ulcer prevention in nursing homes: a two-armed randomized controlled trial              |                           | X                             |                                    |                                           | U                                  | U                         |                                  |                                  |                   |                              |

|                                   |                        |                                                                                                                                                                                           |   |   |   |   |   |   |   |   |   |  |  |   |
|-----------------------------------|------------------------|-------------------------------------------------------------------------------------------------------------------------------------------------------------------------------------------|---|---|---|---|---|---|---|---|---|--|--|---|
| Berkhout;<br>Berkhout;<br>Boumans | 2003,<br>2004;<br>2005 | Effects of resident-oriented care on job characteristics of nursing caregivers                                                                                                            | X | X | X |   |   | U | X | U |   |  |  | X |
| Boorsma                           | 2011                   | Effects of multidisciplinary integrated care on quality of care in residential care facilities for elderly people: a cluster randomized trial.                                            |   | X | U |   |   |   |   | U |   |  |  |   |
| Boumans                           | 2005                   | Effects of resident-oriented care on quality of care, wellbeing and satisfaction with care                                                                                                | X | X |   |   |   |   | U | X |   |  |  |   |
| Bouwen                            | 2008                   | Rate of accidental falls in institutionalized older people with and without cognitive impairment halved as a result of a staff-oriented intervention                                      | U | X | U |   |   | X | X |   |   |  |  | X |
| Bravo                             | 2005                   | Using goal attainment scaling to improve the quality of long-term care: a group-randomized trial                                                                                          | U | X |   |   |   |   |   |   |   |  |  |   |
| Burack;<br>Burack                 | 2012;<br>2012          | The impact of culture change on elders' behavioral symptoms: a longitudinal study                                                                                                         | X | X | U | U | X | X | X | U | U |  |  | X |
| Burgio                            | 2001                   | Come talk with me: improving communication between nursing assistants and nursing home residents during care routines                                                                     | U | X |   |   | X | X |   |   |   |  |  | X |
| Chenoweth                         | 2009                   | Caring for aged dementia care resident study (CADRES) of person-centered care, dementia-care mapping, and usual care in dementia: a cluster randomized trial                              |   | X |   |   |   |   |   |   |   |  |  |   |
| Clare                             | 2013                   | AwareCare: a pilot randomized controlled trial of an awareness-based staff training intervention to improve quality of life for residents with severe dementia in long-term care settings | X | X | X |   |   | U |   |   |   |  |  | X |
| Cox                               | 2008                   | Educating nursing home staff on fracture prevention: a cluster randomized trial                                                                                                           |   | X | U |   |   | U |   |   |   |  |  |   |

|                     |               |                                                                                                                                                                               |   |   |   |   |   |   |   |   |   |   |
|---------------------|---------------|-------------------------------------------------------------------------------------------------------------------------------------------------------------------------------|---|---|---|---|---|---|---|---|---|---|
| Crotty              | 2004          | An outreach intervention to implement evidence based practice in residential care: a randomized controlled trial                                                              |   | X |   |   | X |   |   | X |   |   |
| Crotty              | 2004          | An outreach geriatric medication advisory service in residential aged care: a randomized controlled trial of case conferencing                                                |   | X |   |   |   | U | X | X | U | X |
| De Visschere        | 2010          | Effect evaluation of a supervised versus non-supervised implementation of an oral health care guideline in nursing homes: a cluster randomized controlled clinical trial.     | U | X |   |   |   |   |   |   |   |   |
| Deudon              | 2009          | Non-pharmacological management of behavioral symptoms in nursing homes                                                                                                        | U | X | X |   |   |   |   |   |   | X |
| Eisses              | 2005          | Care staff training in detection of depression in residential homes for the elderly: randomized trial                                                                         | U | X |   |   |   |   |   |   |   |   |
| Finnema             | 2005          | The effect of integrated emotion-oriented care versus usual care on elderly persons with dementia in the nursing home and on nursing assistants: a randomized clinical trial. | U | X |   |   |   | X |   |   | U |   |
| Fossey              | 2006          | Effect of enhanced psychosocial care on antipsychotic use in nursing home residents with severe dementia: cluster randomized trial.                                           |   | X |   |   | U |   |   |   |   |   |
| Frenkel             | 2001          | Improving oral health in institutionalized elderly people by educating caregivers: a randomized controlled trial                                                              |   | X |   |   |   |   |   |   |   |   |
| Gaskill             | 2009          | Maintaining nutrition in aged care residents with a train-the-trainer intervention and nutrition coordinator                                                                  |   |   | U | U | X | U |   |   |   |   |
| Gulpers;<br>Gulpers | 2011;<br>2013 | Belt restraint reduction in nursing homes: effects of a multi-component intervention program                                                                                  | X | X |   |   | X |   |   |   |   | U |



|                     |               |                                                                                                                                 |   |   |   |   |   |   |   |  |  |  |   |
|---------------------|---------------|---------------------------------------------------------------------------------------------------------------------------------|---|---|---|---|---|---|---|--|--|--|---|
| Makris              | 2000          | Effect of a comprehensive infection control program on the incidence of infections in long-term care facilities                 | U | X | X | X |   | X |   |  |  |  |   |
| Meador              | 1997          | Predictors of antipsychotic withdrawal or dose reduction in a randomized controlled trial of provider education                 | U | X |   |   | X |   |   |  |  |  | X |
| Meyer               | 2003          | Effect on hip fractures of increased use of hip protectors in nursing homes: cluster randomized controlled trial                |   | X |   |   |   |   |   |  |  |  |   |
| Molloy              | 2000          | Systematic implementation of an advance directive program in nursing homes                                                      | U | X |   |   | U | U |   |  |  |  |   |
| Naughton            | 2001          | Antibiotic use, hospital admissions, and mortality before and after implementing guidelines for nursing home-acquired pneumonia | U |   |   |   |   |   |   |  |  |  | X |
| O'Halloran          | 2004          | A cluster randomized controlled trial to evaluate a policy of making hip protectors available to residents of nursing homes     | U | X | U | U | X | X |   |  |  |  |   |
| Proctor;<br>Proctor | 1998,<br>1999 | Behavioral management in nursing and residential homes: a randomized controlled trial.                                          |   | X | X |   | U | U |   |  |  |  |   |
| Rantz               | 2012          | Randomized multilevel intervention to improve outcomes of residents in nursing homes in need of improvement.                    | U | X |   |   | X | X |   |  |  |  | X |
| Rantz               | 2001          | Randomized clinical trial of a quality improvement intervention in nursing homes.                                               | U | X |   |   | X | X |   |  |  |  |   |
| Rantz               | 2010          | Cost, staffing and quality impact of bedside electronic medical record (EMR) in nursing homes                                   | X | X | U |   | X |   |   |  |  |  | X |
| Rapp                | 2010          | Effect of a statewide fall prevention program on incidence of femoral fractures in residents of long-term care facilities       |   | X | U |   | U | X | X |  |  |  | U |
| Rask                | 2007          | Implementation and evaluation of a nursing home fall management program                                                         | X | X |   |   |   | X | X |  |  |  |   |



|                          |            |                                                                                                                                                        |   |   |   |   |   |  |   |   |   |   |   |
|--------------------------|------------|--------------------------------------------------------------------------------------------------------------------------------------------------------|---|---|---|---|---|--|---|---|---|---|---|
| van Gaal                 | 2011, 2011 | Fewer adverse events as a result of the SAFE or SORRY? Programme in hospitals and nursing homes. Part I: Primary outcome of a cluster randomized trial |   | X |   |   |   |  | U |   |   |   |   |
| van Weert ; van Weert    | 2004, 2006 | Effects of snoezelen, in 24 h dementia care, on nurse-patient communication during morning care                                                        | X | X |   |   |   |  |   | X |   |   | X |
| Wagner                   | 2005       | Impact of a falls menu-driven incident-reporting system on documentation and quality improvement in nursing homes.                                     | X | X | U | U |   |  | X |   | U | X | X |
| Westbury; Westbury       | 2010, 2011 | An effective approach to decrease antipsychotic and benzodiazepine use in nursing homes: the RedUse project.                                           | X | X |   |   |   |  | X |   |   |   |   |
| Westergren; Westergren , | 2009, 2010 | Do study circles and a nutritional care policy improve nutritional care in a short- and long-term perspective in special accommodations?               | X | X |   | U | X |  | X |   | U |   | X |
| Zimmerman                | 2010       | Outcomes of a dementia care training program for staff in nursing homes and residential care/assisted living settings                                  | U | X |   | U |   |  | U |   |   |   |   |

X – presence of bias, U – unclear whether bias is present
